# Supplementary material for: An efficient bifunctional electrocatalyst based on a nickel iron layered double hydroxide functionalized Co3O4 core shell structure in alkaline media
Source: Royal Society of Chemistry journal article supplement (doi:10.1039/c9cy00351g), 2019-01-01
Supplement: c9cy00351g1.pdf [file c9cy00351g1.pdf]

## Supplementary data

### **An efficient bifunctional electrocatalyst based on nickel iron layered double hydroxide functionalized Co<sub>3</sub>O<sub>4</sub> core shell structure in alkaline media**

Aneela Tahira<sup>a\*</sup>, Zafar Hussain Ibupoto<sup>b</sup>, Mikhail Vagin<sup>c</sup>, Umair Aftab<sup>d</sup>, Muhammad Ishaq Abro<sup>d</sup>, Magnus Willander<sup>a</sup>, Omer Nur<sup>a</sup>

<sup>a</sup>Department of Science and Technology, Campus Norrköping, Linköping University, SE-60174 Norrköping, Sweden

<sup>b</sup>Dr. M.A Kazi Institute of Chemistry University of Sindh Jamshoro, 76080, Sindh Pakistan

<sup>c</sup> Department of Physics, Chemistry and Biology, Linköping University, 58183 Linköping, Sweden

<sup>d</sup>Mehran University of Engineering and Technology, 7680 Jamshoro, Sindh Pakistan

**Corresponding author:** Aneela Tahira\*

**Email address:** [aneela.tahira@liu.se](mailto:aneela.tahira@liu.se)

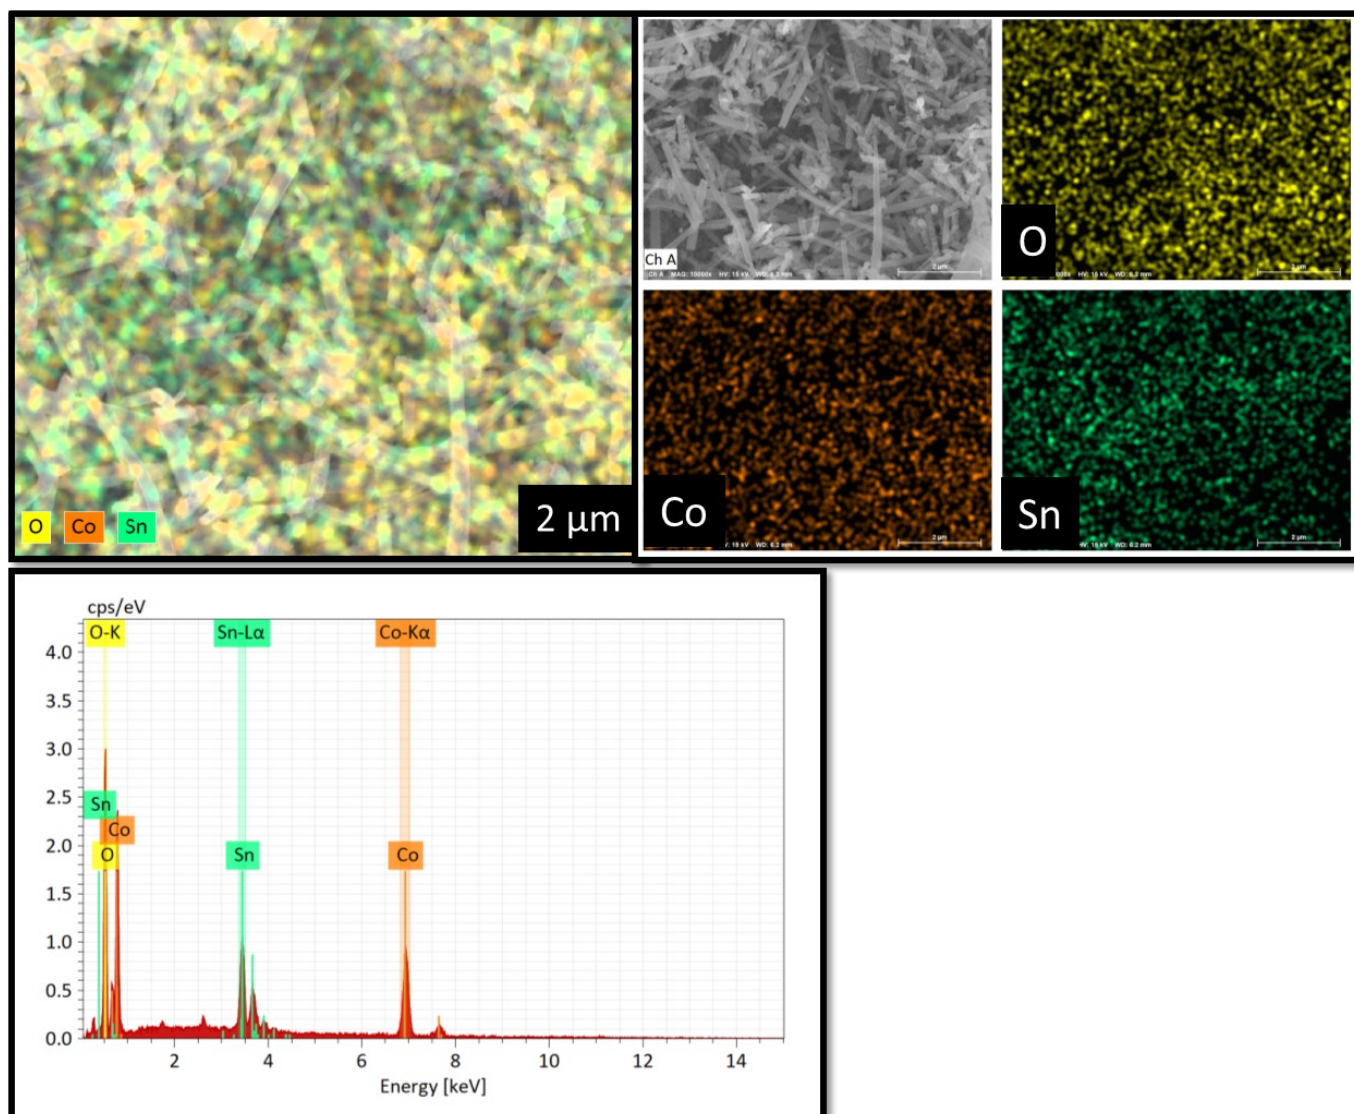

**S1.** EDS mapping for the elemental distribution in pristine  $\text{Co}_3\text{O}_4$

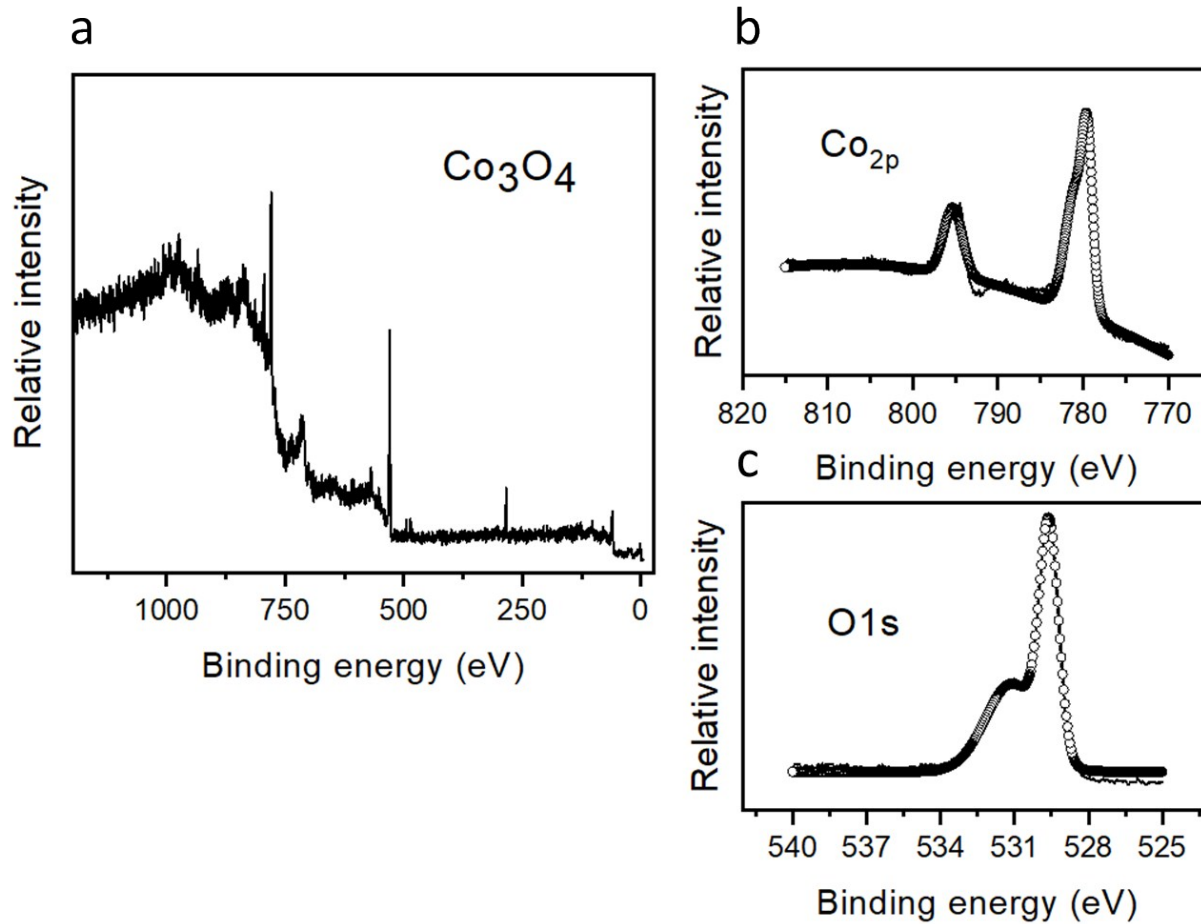

**S2.** a. wide scan survey spectra of pristine  $\text{Co}_3\text{O}_4$ , b. Co 2p XPS spectra of pristine  $\text{Co}_3\text{O}_4$ , c. O 1s for pristine  $\text{Co}_3\text{O}_4$

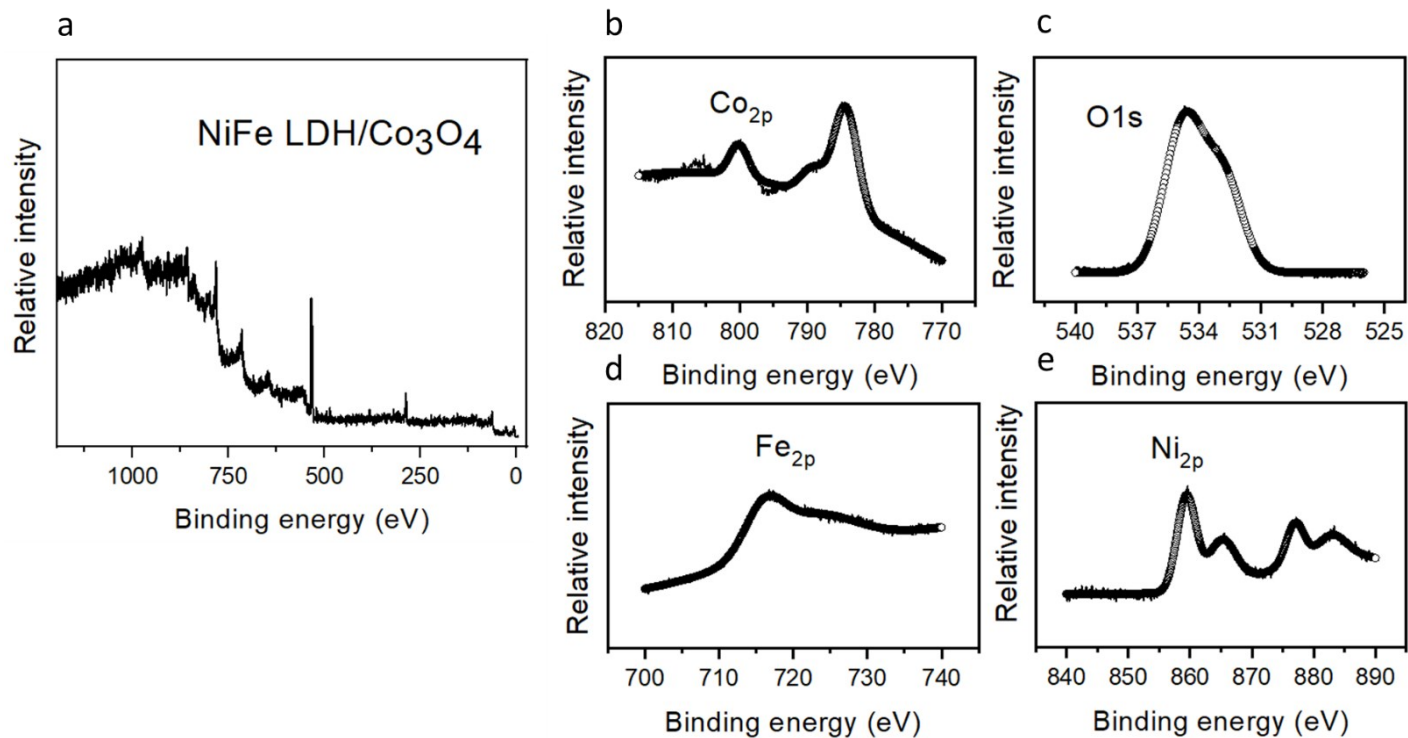

**S3. a.** XPS survey spectrum of NiFeLDH functionalized Co<sub>3</sub>O<sub>4</sub>, **4b.** Co 2p XPS spectra of Co<sub>3</sub>O<sub>4</sub> functionalized with NiFeLDH, **4c.** O 1s of Co<sub>3</sub>O<sub>4</sub>, **4d.** Fe 2p in the NiFe LDH, **4e.** high-resolution XPS of Ni 2p of NiFeLDH functionalized Co<sub>3</sub>O<sub>4</sub>.

**Table S1** Comparison of OER activities of the NiFeLDH functionalized Co<sub>3</sub>O<sub>4</sub> core shell structure with efficient previously reported electrocatalysts in 1M KOH

| Catalyst                                                 | Tafel slope<br>mVdec <sup>-1</sup> | Overpotential<br>@ 10 mA/cm <sup>2</sup> | Reference |
|----------------------------------------------------------|------------------------------------|------------------------------------------|-----------|
| CoCo LDH                                                 | 59                                 | 393                                      | 1         |
| CoO <sub>x</sub> @CN                                     |                                    | ~385                                     | 2         |
| Co-P films                                               | 47                                 | 345                                      | 3         |
| MnCo <sub>2</sub> O <sub>x</sub>                         | 84                                 | > 410                                    | 4         |
| Co <sub>3</sub> O <sub>4</sub> /N-rmGO                   | 67                                 | 310                                      | 5         |
| NiCoO <sub>x</sub>                                       |                                    | 420                                      | 6         |
| N-G-CoO                                                  | 71                                 | 340                                      | 7         |
| Ni <sub>x</sub> Co <sub>3-x</sub> O                      | 64                                 | 370                                      | 8         |
| NiFe LDH-NS @ DG10<br>hybrid Free-Standing               | 52                                 | 210                                      | 9         |
| Exfoliated NiFe LDHs                                     | 40                                 | 300                                      | 10        |
| NiFe LDH/NF                                              | 52.8                               | 224                                      | 11        |
| NiFe LDH/NF                                              |                                    | 240                                      | 12        |
| Co <sub>9</sub> S <sub>8</sub> /CNS/CNT                  | 48                                 | 267                                      | 13        |
| FeCoW alloy                                              |                                    | 232                                      | 14        |
| Co <sub>3</sub> O <sub>4</sub>                           | 84                                 | 290                                      | 15        |
| N-Co <sub>3</sub> O <sub>4</sub>                         | 59                                 | 310                                      | 16        |
| RuO <sub>2</sub>                                         |                                    | 366                                      | 17        |
| IrO <sub>2</sub> /NF                                     | 46                                 | 285                                      | 18        |
| Co <sub>3</sub> O <sub>4</sub> hollow<br>polyhedrons     |                                    | 536                                      | 19        |
| Co (OH) <sub>2</sub> @g-C <sub>3</sub> N <sub>4</sub> -5 |                                    | 320                                      | 20        |
| CoP@PNC                                                  |                                    | 330                                      | 21        |

|                                            |     |                                          |           |
|--------------------------------------------|-----|------------------------------------------|-----------|
| SOA-Co <sub>4</sub> N NW/CC                |     | 257                                      | 22        |
| CoP <sub>3</sub> NSs/CC                    |     | 291                                      | 23        |
| CoNPs@C                                    |     | 270                                      | 24        |
| NiFeLDH/Co <sub>3</sub> O <sub>4</sub> NWs | 120 | 1.49 V vs RHE<br>@ 40 mA/cm <sup>2</sup> | This work |

**Table S2** Comparison of HER activities of the NiFeLDH functionalized Co<sub>3</sub>O<sub>4</sub> core shell structure with efficient previously reported electrocatalysts in 1M KOH

| <b>Catalyst</b>                               | <b>Tafel slope<br/>mVdec<sup>-1</sup></b> | <b>Overpotential<br/>@ 10 mA/cm<sup>2</sup></b> | <b>References</b> |
|-----------------------------------------------|-------------------------------------------|-------------------------------------------------|-------------------|
| CoP/CC, 500                                   | 129                                       | 500                                             | 25                |
| N, P-G                                        | 145                                       | 700                                             | 26                |
| MoS <sub>x</sub>                              |                                           | 540                                             | 27                |
| Co-S/FTO                                      |                                           | 480                                             | 28                |
| Co-NRCNTs                                     |                                           | 450                                             | 29                |
| Co-N-C                                        |                                           | 270                                             | 30                |
| CoO <sub>x</sub> @CN                          |                                           | 235                                             | 31                |
| Ni <sub>3</sub> FeN-NPs                       |                                           | 238                                             | 32                |
| Ni <sub>2</sub> P on Ni foam                  |                                           | 221                                             | 33                |
| NiFeLDH/Co <sub>3</sub> O <sub>4</sub><br>NWs | 79                                        | -303 mV vs<br>RHE @ 10<br>mA/cm <sup>2</sup>    | This work         |

## References

1. F. Song and X. Hu, *Nature communications*, 2014, **5**, 4477.
2. H. Jin, J. Wang, D. Su, Z. Wei, Z. Pang and Y. Wang, *Journal of the American Chemical Society*, 2015, **137**, 2688-2694.
3. N. Jiang, B. You, M. Sheng and Y. Sun, *Angewandte Chemie*, 2015, **127**, 6349-6352.
4. F. Song and X. Hu, *Journal of the American Chemical Society*, 2014, **136**, 16481-16484.
5. Y. Liang, Y. Li, H. Wang, J. Zhou, J. Wang, T. Regier and H. Dai, *Nature materials*, 2011, **10**, 780.
6. C. C. McCrory, S. Jung, J. C. Peters and T. F. Jaramillo, *Journal of the American Chemical Society*, 2013, **135**, 16977-16987.
7. S. Mao, Z. Wen, T. Huang, Y. Hou and J. Chen, *Energy & Environmental Science*, 2014, **7**, 609-616.
8. Y. Li, P. Hasin and Y. Wu, *Advanced materials*, 2010, **22**, 1926-1929.
9. Y. Jia, L. Zhang, G. Gao, H. Chen, B. Wang, J. Zhou, M. T. Soo, M. Hong, X. Yan and G. Qian, *Advanced materials*, 2017, **29**, 1700017.
10. X. Long, J. Li, S. Xiao, K. Yan, Z. Wang, H. Chen and S. Yang, *Angewandte Chemie*, 2014, **126**, 7714-7718.
11. Z. Li, M. Shao, H. An, Z. Wang, S. Xu, M. Wei, D. G. Evans and X. Duan, *Chemical science*, 2015, **6**, 6624-6631.
12. J. Luo, J.-H. Im, M. T. Mayer, M. Schreier, M. K. Nazeeruddin, N.-G. Park, S. D. Tilley, H. J. Fan and M. Grätzel, *Science*, 2014, **345**, 1593-1596.
13. M. Al-Mamun, Y. Wang, P. Liu, Y. L. Zhong, H. Yin, X. Su, H. Zhang, H. Yang, D. Wang and Z. Tang, *Journal of Materials Chemistry A*, 2016, **4**, 18314-18321.
14. L. C. Seitz, C. F. Dickens, K. Nishio, Y. Hikita, J. Montoya, A. Doyle, C. Kirk, A. Vojvodic, H. Y. Hwang and J. K. Nørskov, *Science*, 2016, **353**, 1011-1014.
15. Y. P. Zhu, T. Y. Ma, M. Jaroniec and S. Z. Qiao, *Angewandte Chemie International Edition*, 2017, **56**, 1324-1328.
16. L. Xu, Z. Wang, J. Wang, Z. Xiao, X. Huang, Z. Liu and S. Wang, *Nanotechnology*, 2017, **28**, 165402.
17. M.-R. Gao, X. Cao, Q. Gao, Y.-F. Xu, Y.-R. Zheng, J. Jiang and S.-H. Yu, *Acs Nano*, 2014, **8**, 3970-3978.
18. X. Yan, K. Li, L. Lyu, F. Song, J. He, D. Niu, L. Liu, X. Hu and X. Chen, *ACS applied materials & interfaces*, 2016, **8**, 3208-3214.
19. D. Dong, Y. Liu and J. Li, *Particle & Particle Systems Characterization*, 2016, **33**, 887-895.
20. M. Tahir, N. Mahmood, L. Pan, Z.-F. Huang, Z. Lv, J. Zhang, F. K. Butt, G. Shen, X. Zhang and S. X. Dou, *Journal of Materials Chemistry A*, 2016, **4**, 12940-12946.
21. Z. Zhou, N. Mahmood, Y. Zhang, L. Pan, L. Wang, X. Zhang and J.-J. Zou, *Journal of Energy Chemistry*, 2017, **26**, 1223-1230.
22. P. Chen, K. Xu, Z. Fang, Y. Tong, J. Wu, X. Lu, X. Peng, H. Ding, C. Wu and Y. Xie, *Angewandte Chemie*, 2015, **127**, 14923-14927.
23. T. Wu, M. Pi, X. Wang, W. Guo, D. Zhang and S. Chen, *Journal of Alloys and Compounds*, 2017, **729**, 203-209.
24. Q. Jin, B. Ren, D. Li, H. Cui and C. Wang, *ACS applied materials & interfaces*, 2017, **9**, 31913-31921.
25. J. Tian, Q. Liu, A. M. Asiri, and X. Sun, *J. Am. Chem. Soc* 2014, **136**, 7587-7590.

26. Y. Zheng, Y. Jiao, L. H. Li, T. Xing, Y. Chen, M. Jaroniec and S. Z. Qiao, *Acs Nano*, 2014, **8**, 5290-5296.
27. D. Merki, S. Fierro, H. Vrubel and X. Hu, *Chemical science*, 2011, **2**, 1262-1267.
28. Y. Sun, C. Liu, D. C. Grauer, J. Yano, J. R. Long, P. Yang and C. J. Chang, *Journal of the American Chemical Society*, 2013, **135**, 17699-17702.
29. X. Zou, X. Huang, A. Goswami, R. Silva, B. R. Sathe, E. Mikmeková and T. Asefa, *Angewandte Chemie International Edition*, 2014, **53**, 4372-4376.
30. L. Zhang, W. Liu, Y. Dou, Z. Du and M. Shao, *The Journal of Physical Chemistry C*, 2016, **120**, 29047-29053.
31. H.Y. Jin, J. Wang, D.F. Su, Z.Z. Wei, Z.F. Pang, Y. Wang, *J. Am. Chem. Soc* 2015, **137**, 2688-2694.
32. Q. Chen, R. Wang, M. Yu, Y. Zeng, F. Lu, X. Kuang and X. Lu, *Electrochimica Acta*, 2017, **247**, 666-673.
33. L.-A. Stern, L. Feng, F. Song and X. Hu, *Energy & Environmental Science*, 2015, **8**, 2347-2351.
